# Supplementary material for: Three dimensional cyclic trinuclear units based metal–covalent organic frameworks for electrochemical CO2RR
Source: Royal Society of Chemistry journal article supplement (doi:10.1039/d3cc02285d), 2023-01-01
Supplement: d3cc02285d1.pdf [file d3cc02285d1.pdf]

## Supplementary Information

### Three Dimensional Cyclic Trinuclear Units Based Metal-Covalent Organic Frameworks for Electrochemical CO<sub>2</sub>RR

Zhenli Liu,<sup>a,b</sup> Shichen Yan,<sup>\*a</sup> Qianrong Fang,<sup>c</sup> Yaobing Wang,<sup>a</sup> Daqiang Yuan<sup>\*a</sup>

---

<sup>a</sup> CAS Key Laboratory of Design and Assembly of Functional Nanostructures, and Fujian Provincial Key Laboratory of Nanomaterials, State Key Laboratory of Structural Chemistry, Fujian Institute of Research on the Structure of Matter, Chinese Academy of Sciences, Fuzhou 350002, Fujian, P.R. China.

<sup>b</sup> College of Chemistry and Materials Science, Fujian Normal University, Fuzhou 350007, P. R. China.

<sup>c</sup> State Key Laboratory of Inorganic Synthesis and Preparative Chemistry, Jilin University, Changchun 130012, China

Email: [yansch@fjirsm.ac.cn](mailto:yansch@fjirsm.ac.cn); [ydq@fjirsm.ac.cn](mailto:ydq@fjirsm.ac.cn)

## Section S1. Materials and characterization

### S1.1 Materials and General Methods

All reagents and solvents were obtained from commercial suppliers and used without further purification (Sigma-Aldrich, TCI, J&K Scientific LTD). The powder X-ray diffraction (PXRD) data were measured on a PANalytical B.V. Empyrean powder diffractometer with Cu K $\alpha$  radiation ( $\lambda = 1.5418 \text{ \AA}$ ) over the range of  $2\theta = 2.0\text{--}40.0^\circ$  with a step size of  $0.02^\circ$ . Thermogravimetric curves were obtained using a SHIMADZU DTG-60 thermal analyzer under N<sub>2</sub> atmosphere with a heating rate of  $10^\circ\text{C}\cdot\text{min}^{-1}$ . The operational range was from  $30^\circ\text{C}$  to  $800^\circ\text{C}$ . Solid-state <sup>13</sup>C NMR spectra were determined on an AVIII 400 MHz solid-state NMR spectrometer. FT-IR spectra (KBr) were recorded by using a SHIMADZU IRAffinity-1 Fourier transform infrared spectrophotometer. Data of Brunauer-Emmer-Teller (BET) surface area and porosity were collected by using a **B**SD-PS Specific Surface area & Pore Size Analyzer at 77 K. Before gas adsorption measurement, and the samples were washed by acetone three times ( $3 \times 5.0 \text{ ml}$ ) and the acetone was extracted under vacuum at  $85^\circ\text{C}$  to provide the sample for sorption analysis. X-ray photoelectron spectroscopy was operated on Thermo Scientific ESCALAB 250 Xi X-ray photoelectron spectrometer. JEM-2100 transmission electron microscopy was applied for TEM images, and the scanning electron microscopy (SEM) images were obtained on JEOL JSM-6700 scanning electron microscope. ICP analysis was carried out on an Ultima 2 analyzer. Electrochemical CO<sub>2</sub>RR measurements were performed in a three-electrode H-type cell with an electrochemical station (CHI 660E). CO<sub>2</sub> (99.999%) was purchased from Xinhang Gas (Fuzhou, China). The gas products were analyzed by gas chromatography (9790II FULI), and liquid products were detected by gas chromatography (9720 FULI). Formic acid was detected by an ion chromatograph (CIC-D100).

### S1.2 The synthesis of 3D-CTU-MCOF

#### Synthesis of Cu<sub>3</sub>L

The synthesis of Cu<sub>3</sub>L was carried out according to the procedure described in the literature.<sup>S1</sup> 1*H*-pyrazole-4-carbaldehyde (96 mg, 1.0 mmol), Cu(NO<sub>3</sub>) $\cdot$ 3H<sub>2</sub>O (200 mg, 0.83 mmol), *N,N*-dimethylformamide (6.7 ml), H<sub>2</sub>O (5.0 ml) and ethanol (6.7 ml) were added to a 25

ml Teflon-lined reactor. The mixture was then sonicated to obtain a blue solution. The mixture was heated at 100°C for 12 h under autogenous pressure and then cooled to room temperature. Light yellow crystals were obtained and washed with water and acetone for three times, respectively. And then, the product was dried under vacuum at 120 °C for 24 h (yield: 53.6 % based on Cu). IR (KBr):  $\nu = 1670\text{ cm}^{-1}$ ,  $1535\text{ cm}^{-1}$ ,  $1418\text{ cm}^{-1}$ ,  $1203\text{ cm}^{-1}$ ,  $1045\text{ cm}^{-1}$ ,  $770\text{ cm}^{-1}$ ,  $625\text{ cm}^{-1}$ .

### Synthesis of 3D-CTU-MCOF

A Pyrex tube measuring o.d.  $\times$  i.d. =  $10 \times 8\text{ mm}^3$  was charged with Cu<sub>3</sub>L (38 mg, 0.08 mmol) and TAA (12 mg, 0.06 mmol), 1,4-dioxane (0.5 ml), 1,3,5-mesitylene (0.5 ml) and aqueous acetic acid (6 M, 0.1 ml). And then, the tube was flash frozen at 77 K, evacuated to an internal pressure of 0.15 mmHg, and flame sealed. Upon sealing, the tube length was reduced to ca. 13 cm. Subsequently, the mixture was heated at 120°C for three days to afford yellow precipitate. The product was isolated as powders by filtration and washed with ethanol, DMF, and acetone.

### S1.3 General procedures of electrochemical measurements

All electrochemical measurements were carried out with a CHI 660E electrochemical station in an H-type electrolytic cell. Moreover, the active MCOFs sample was used for electrochemical catalytic experiments. The preparation method of working electrode was as follows. The mixture of catalysts (5 mg) and carbon black (1 mg) was dispersed in isopropanol (0.9 ml), and then 5% Nafion (0.1 ml) was added. The resulting mixture was sonicated for 30 min to obtain the ink. 0.05 ml of ink was dropped onto carbon paper with a catalyst loading of  $0.25\text{ mg cm}^{-2}$ . The Ag/AgCl electrode was used as the reference electrode, and a Pt sheet electrode ( $1 \times 1\text{ cm}^2$ ) was used as the counter electrode in all measurements.

The electrolytic cell, separated by a Nafion 211 membrane, was filled with 0.1 M EmimBF<sub>4</sub> in acetonitrile (the content of H<sub>2</sub>O: 1.23%). The electrolyte was purged with CO<sub>2</sub> or Ar for 30 min before electrochemical measurements. The linear sweep voltammogram (LSV) scan rate was set to  $20\text{ mV s}^{-1}$  in  $-1.0 \sim -2.4\text{ V vs. SHE}$ . CO<sub>2</sub> was controlled to flow through the cathode compartment at a rate of  $20\text{ ml min}^{-1}$ . CV curves of MCOFs were obtained in a potential range of  $0.60 \sim 0.70\text{ V vs. SHE}$  (Cu<sub>3</sub>L:  $0.45 \sim 0.55\text{ V vs. SHE}$ ) and the scan rates were  $10\text{ mV s}^{-1}$ ,  $20\text{ mV s}^{-1}$ ,  $30\text{ mV s}^{-1}$ ,  $40\text{ mV s}^{-1}$ ,  $50\text{ mV s}^{-1}$ ,  $60\text{ mV s}^{-1}$ ,  $70\text{ mV s}^{-1}$ ,  $80\text{ mV s}^{-1}$ ,  $90\text{ mV s}^{-1}$ ,  $100\text{ mV s}^{-1}$ .

Product analysis. The gas products were detected by a FULI 9790II gas chromatograph (GC) equipped with a thermal conductivity detector (for H<sub>2</sub>) and a flame ionization detector (for CO, CH<sub>4</sub>, C<sub>2</sub>H<sub>4</sub>). The products were collected after running the reaction for 800s. After repeating the test three times for each sample, the FE was calculated based on the average value.

$$FE_{H_2} = \frac{H_{2ppm} \times Q_{gas} \times 2e \times 96485}{22.4 \times i}$$

$$FE_{CO} = \frac{CO_{ppm} \times Q_{gas} \times 2e \times 96485}{22.4 \times i}$$

$$FE_{CH_4} = \frac{CH_{4ppm} \times Q_{gas} \times 8e \times 96485}{22.4 \times i}$$

$$FE_{C_2H_4} = \frac{C_2H_{4ppm} \times Q_{gas} \times 12e \times 96485}{22.4 \times i}$$

H<sub>2ppm</sub>: the ppm value of H<sub>2</sub> in the gas mixture;

CO<sub>ppm</sub>: the ppm value of CO in the gas mixture;

CH<sub>4ppm</sub>: the ppm value of CH<sub>4</sub> in the gas mixture;

C<sub>2</sub>H<sub>4ppm</sub>: the ppm value of C<sub>2</sub>H<sub>4</sub> in the gas mixture;

Q<sub>gas</sub>: the gas flow rate in the reactor;

“2e”“2e”“8e”“12e”: the number of electrons to be transferred for H<sub>2</sub>, CO, CH<sub>4</sub> and C<sub>2</sub>H<sub>4</sub> products, respectively;

i: average current at a steady state (A);

96485: Faraday constant (C mol<sup>-1</sup>);

22.4: molar volume of the gas (L mol<sup>-1</sup>).

The FE of each liquid phase product can be calculated using the following equations:

$$FE (\%) = \frac{Q_{product}}{Q_{Total}} \times 100\% = \frac{n_{product} \times N \times F}{j \times t} \times 100\%$$

Where Q<sub>product</sub> is the amount of electric charge required to produce a specific product, Q<sub>total</sub> is the total amount of electric charge consumed, n<sub>product</sub> denotes the molar mass that produces a specific product, N denotes the number of electrons that have undergone a specific reaction transfer, F denotes the Faraday constant (96485 C mol<sup>-1</sup>), j denotes the total current density, and t is the electrolysis time.

MeOH and EtOH production was detected using a chromatograph (GC 9720, FULI) equipped

with an RB-INOWAX column and an FID detector. The specific formulas for FEs are as follows:

$$FE_{MeOH} = \frac{n_{MeOH} \times 6e \times 96485}{Q_{total}}$$

$$FE_{EtOH} = \frac{n_{EtOH} \times 12e \times 96485}{Q_{total}}$$

$n_{MeOH}$ : the molar amount of methanol;

$n_{EtOH}$ : the molar amount of ethanol;

“6e”“12e”: the number of electrons to be transferred for MeOH and EtOH products, respectively;

$Q_{total}$ : charge number.

HCOOH production was detected using an ion chromatograph (CIC-D100, ION CHROMA TOGRAPHY, SHINE) equipped with a SUGAR SH1101 column, a UV230+ and RI detector. The specific formula for  $FE_{HCOOH}$  is as follows:

$$FE_{HCOOH} = \frac{n_{HCOOH} \times 2e \times 96485}{Q_{total}}$$

$n_{HCOOH}$ : the molar amount of formic acid;

“2e”: the number of electrons to be transferred for HCOOH production;

$Q_{total}$ : charge number; 96485: Faraday constant ( $C \text{ mol}^{-1}$ ).

Table S1.  $FE(C_2H_4)$ ,  $FE(EtOH)$ ,  $FE(CH_3OH)$ ,  $FE(HCOOH)$ ,  $FE(CH_4)$ ,  $FE(CO)$  and  $FE(H_2)$  of (a) 3D-CTU-MCOFs, (b)  $Cu_3L$  at several selected potentials between -1.2 ~ -2.2 V vs SHE.

| Working electrode | Potential (V vs SHE) | FE ( $C_2H_4$ ) (%) | FE (EtOH) (%) | FE ( $CH_3OH$ ) (%) | FE (HCOOH) (%) | FE ( $CH_4$ ) (%) | FE (CO) (%) | FE ( $H_2$ ) (%) |
|-------------------|----------------------|---------------------|---------------|---------------------|----------------|-------------------|-------------|------------------|
| 3D-CTU-MCOF       | -1.2                 | 7.2                 | 5.9           | 3.5                 | 3.9            | 15.7              | 14.9        | 48.6             |
|                   | -1.4                 | 8.5                 | 13.4          | 4.2                 | 2.4            | 12.5              | 20.5        | 38.1             |
|                   | -1.6                 | 9.3                 | 15.6          | 4.5                 | 3.2            | 13.4              | 21.6        | 29.4             |
|                   | -1.8                 | 10.1                | 16.3          | 4.3                 | 2.8            | 14.3              | 21.4        | 25.8             |
|                   | -2.0                 | 9.4                 | 8.9           | 4.2                 | 2.6            | 12.4              | 21.6        | 39.4             |
|                   | -2.2                 | 8.1                 | 3.6           | 2.4                 | 2.3            | 12.7              | 18.4        | 49.9             |
| $Cu_3L$           | -1.2                 | 1.2                 | /             | /                   | /              | 8.7               | 10.1        | 80.7             |
|                   | -1.4                 | 3.5                 | /             | /                   | /              | 7.5               | 22.4        | 70.3             |
|                   | -1.6                 | 3.8                 | /             | /                   | /              | 6.4               | 25.6        | 67.4             |
|                   | -1.8                 | 2.9                 | /             | /                   | /              | 6.3               | 30.4        | 58.4             |
|                   | -2.0                 | 1.4                 | /             | /                   | /              | 5.4               | 25.6        | 68.5             |
|                   | -2.2                 | 0.8                 | /             | /                   | /              | 2.7               | 20.2        | 74.6             |



## Section S2: FTIR spectra

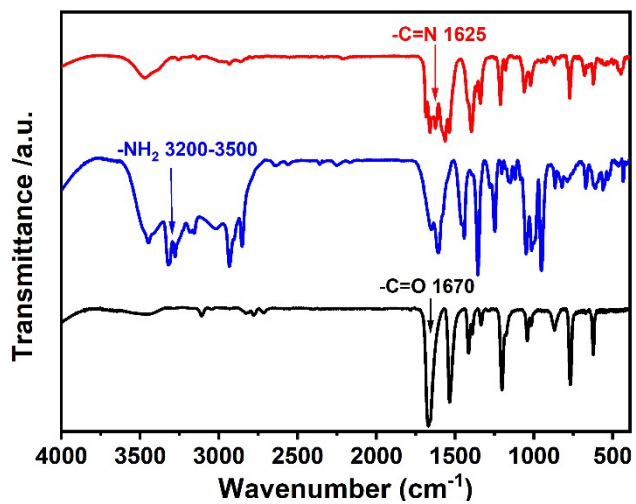

**Fig. S1** FT-IR spectra of 3D-CTU-MCOF (red), TAA (blue), and Cu<sub>3</sub>L(black).

**Section S3:** Solid-state  $^{13}\text{C}$  NMR spectra

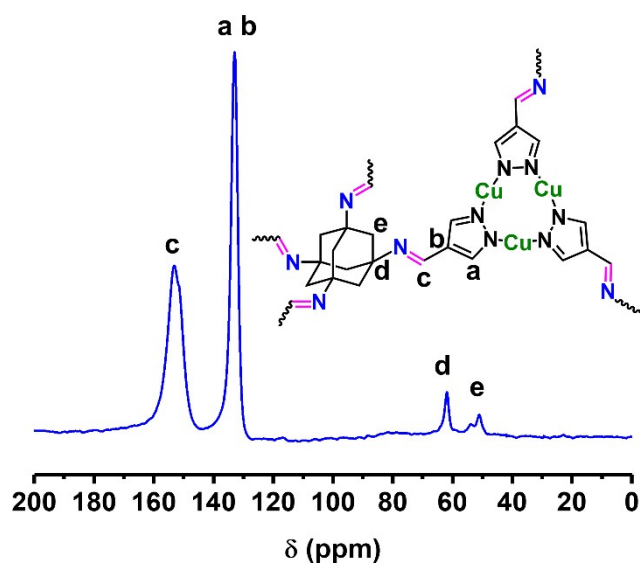

**Fig. S2** Solid-state  $^{13}\text{C}$  NMR spectrum of 3D-CTU-MCOF.



### Section S4: TGA curves

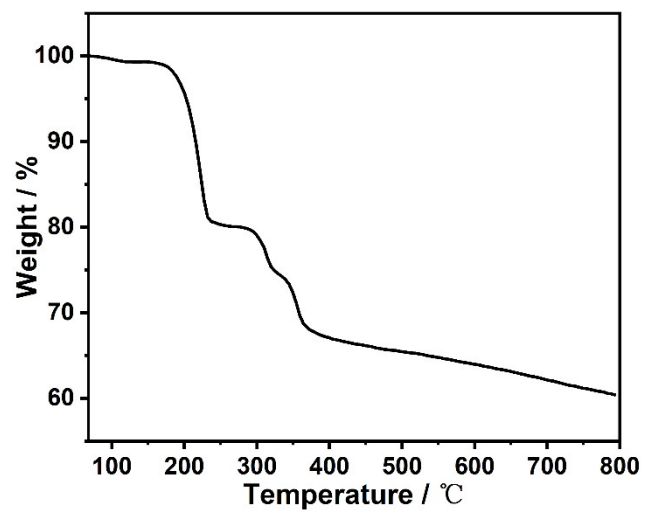

Fig. S3 TGA curve of 3D-CTU-MCOF.

## Section S5: PXRD patterns and structures

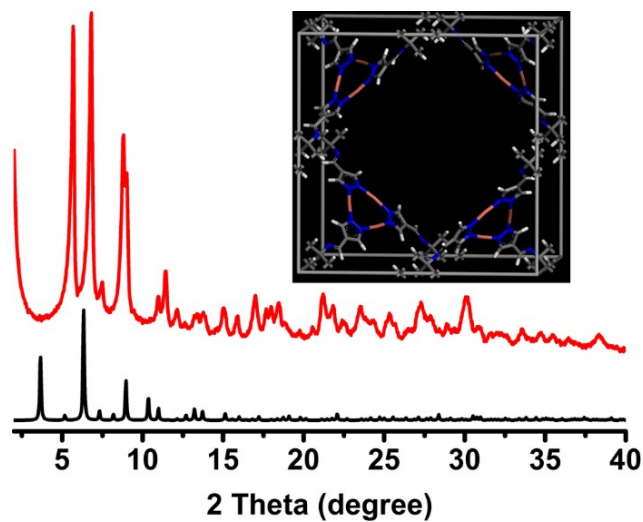

Fig. S4 PXRD patterns of 3D-CTU-MCOF: experimental (red) and simulated (black) with non-interpenetrated **bor** topology. Inset: its structural representation.

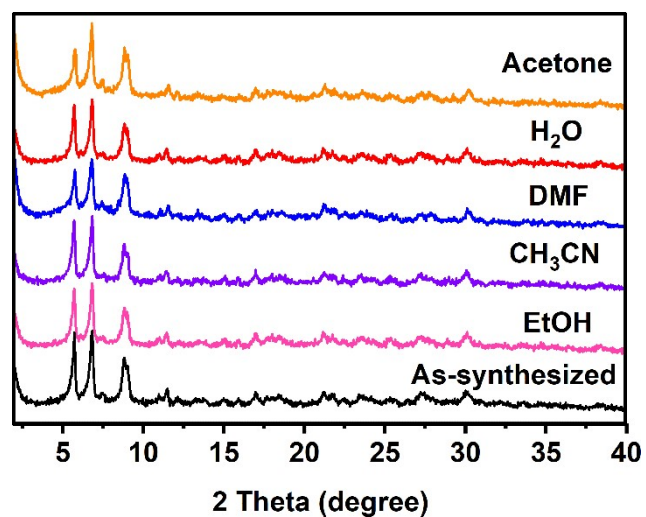

Fig. S5 PXRD patterns of 3D-CTU-MCOF in different solvents for 24 h.

### Section S6: Nitrogen adsorption analysis

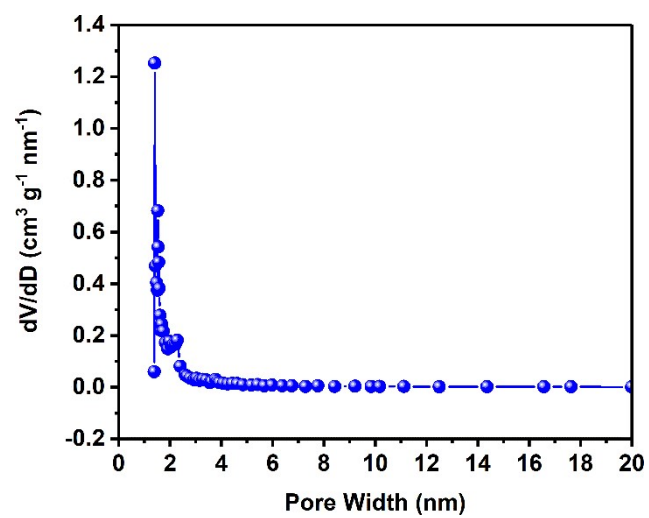

Fig. S6 Pore size distribution of 3D-CTU-MCOF obtained by NLDFT calculation.

**Section S7: X-ray photoelectron spectroscopy (XPS)**

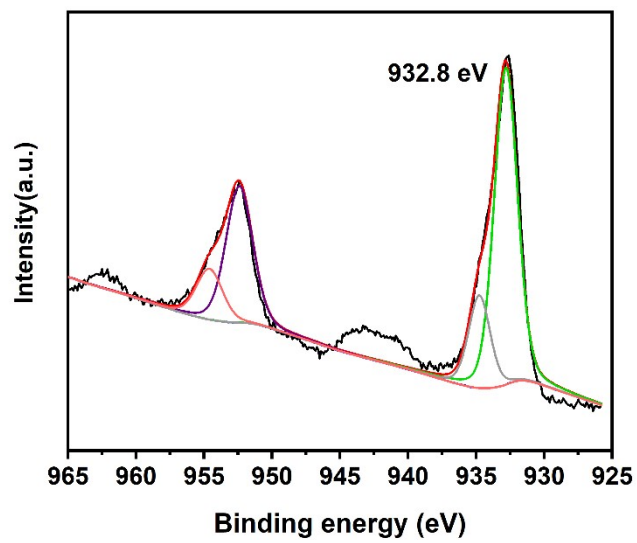

**Fig. S7** XPS data of 3D-CTU-MCOF.

## Section S8: Electrochemical measurements

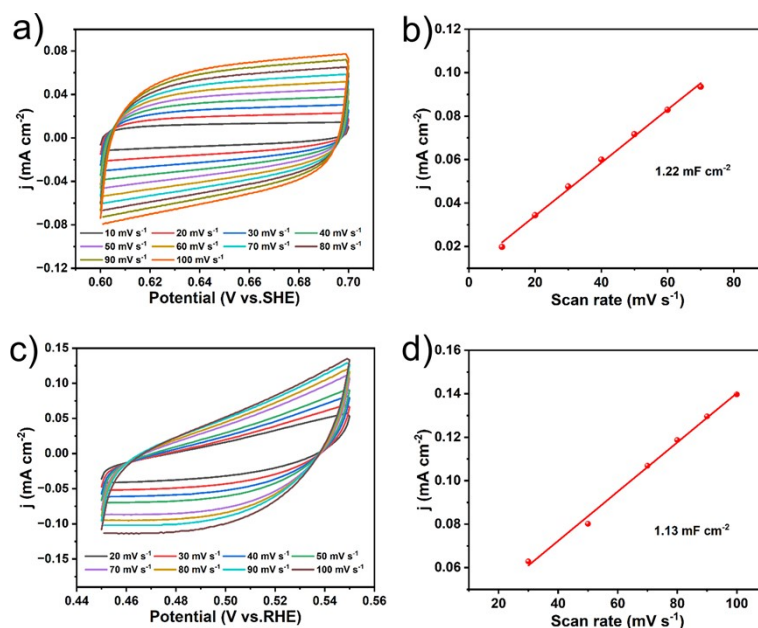

**Fig. S8** Electrochemical double-layer capacitance ( $C_{dl}$ ) measurements were used to determine the electrochemically accessible surface area (ECSA) of the material. Cyclic voltammograms of 3D-CTU-MCOF (a) and  $\text{Cu}_3\text{L}$  (c) at different sweep rates in the non-Faraday region; plots of the current density with different scan rates range for 3D-CTU-MCOF (b) and  $\text{Cu}_3\text{L}$  (d).

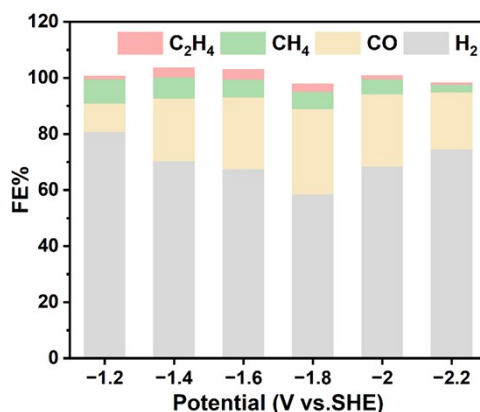

**Fig. S9** Faradaic efficiency of different products with  $\text{Cu}_3\text{L}$  as a catalyst at different potentials.

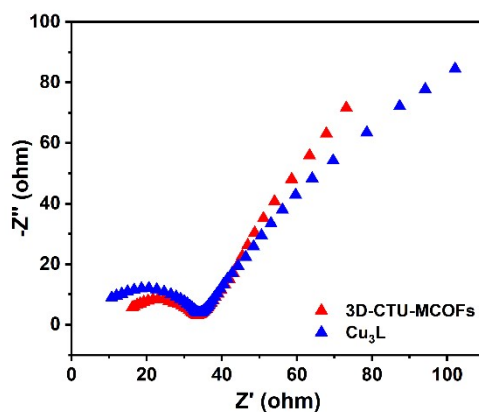

**Fig. S10** Electrochemical impedance spectroscopy (EIS) of 3D-CTU-MCOF (red) and  $\text{Cu}_3\text{L}$  (blue) at open circuit potential

## Section S9: Unit cell parameters and fractional atomic coordinates

**Table S2.** Unit cell parameters and fractional atomic coordinates for 3D-CTU-MCOF calculated based on the non-interpenetrated **ctn** net.

|                      |                                                                       |         |         |
|----------------------|-----------------------------------------------------------------------|---------|---------|
| Space group          | <i>I</i> -43d                                                         |         |         |
| Calculated unit cell | $a = b = c = 37.2424 \text{ \AA}, \alpha = \beta = \gamma = 90^\circ$ |         |         |
| Measured unit cell   | $a = b = c = 37.8218 \text{ \AA}, \alpha = \beta = \gamma = 90^\circ$ |         |         |
| Pawley refinement    | $R_p = 3.59\%, wR_p = 5.76\%$                                         |         |         |
| atoms                | x                                                                     | y       | z       |
| N1                   | 0.30219                                                               | 0.73114 | 0.66391 |
| N2                   | 0.34952                                                               | 0.77322 | 0.75375 |
| C3                   | 0.35644                                                               | 0.81127 | 0.79704 |
| C4                   | 0.38390                                                               | 0.78674 | 0.79977 |
| C5                   | 0.37875                                                               | 0.76294 | 0.77195 |
| N6                   | 0.43595                                                               | 0.76094 | 0.82681 |
| C7                   | 0.41265                                                               | 0.78671 | 0.82638 |
| C8                   | 0.46662                                                               | 0.75663 | 0.85101 |
| Cu9                  | 0.67216                                                               | 0.75007 | 0.70884 |
| C10                  | 0.21033                                                               | 0.62472 | 0.47346 |
| C11                  | 0.25                                                                  | 0.66212 | 0.5     |
| H12                  | 0.35166                                                               | 0.83408 | 0.81415 |
| H13                  | 0.39515                                                               | 0.74010 | 0.76522 |
| H14                  | 0.41367                                                               | 0.80844 | 0.84537 |
| H15                  | 0.18611                                                               | 0.64146 | 0.47769 |
| H16                  | 0.20547                                                               | 0.60720 | 0.44992 |

**Table S3.** Unit cell parameters and fractional atomic coordinates for 3D-CTU-MCOF calculated based on the non-interpenetrated **bor** net.

| Space group          |          | <i>P23</i>                                                            |          |
|----------------------|----------|-----------------------------------------------------------------------|----------|
| Calculated unit cell |          | $a = b = c = 24.2732 \text{ \AA}, \alpha = \beta = \gamma = 90^\circ$ |          |
| atoms                | x        | y                                                                     | z        |
| N1                   | 0.83504  | 0.70002                                                               | -0.84995 |
| N2                   | 0.87077  | 0.70748                                                               | -0.80953 |
| C3                   | 0.67305  | 0.8166                                                                | -0.91357 |
| C4                   | 0.64210  | 0.86337                                                               | -0.90391 |
| C5                   | 0.66003  | 0.88347                                                               | -0.85368 |
| N6                   | 0.57233  | 0.92967                                                               | -0.92673 |
| C7                   | 0.60497  | 0.89048                                                               | -0.943   |
| C8                   | 0.53726  | 0.96288                                                               | -0.96318 |
| Cu9                  | 1.23147  | 1.24887                                                               | 1.13729  |
| H10                  | 0.67242  | 0.79107                                                               | -0.95011 |
| H11                  | 0.64776  | 0.92159                                                               | -0.83409 |
| H12                  | -0.60677 | 0.87843                                                               | -0.98589 |
| H13                  | 0.52518  | 1.101                                                                 | 1.02696  |
| H14                  | 0.52599  | 0.97385                                                               | 0.89969  |
| H15                  | 0.39909  | 0.97421                                                               | 1.02639  |
| C16                  | 1        | 1                                                                     | 1.57371  |
| C17                  | 0.92609  | 1                                                                     | 1.5      |
| C18                  | 1        | 0.92697                                                               | 1.5      |

## Section S10: References

[S1] X. Li, J. Wang, F. Xue, Y. Wu, H. Xu, T. Yi,\* and Q, Li.\* *Angew. Chem. Int. Ed. Engl.*, 2021, 60, 2534-2540.
